1 **Title:** Disturbance-induced changes in size-structure promote coral biodiversity

2 **Authors:** Álvarez-Noriega, Mariana<sup>1,2</sup>; Madin, Joshua S.<sup>3</sup>; Baird, Andrew H.<sup>2</sup>; Dornelas,

3 Maria<sup>4</sup>; Connolly, Sean R<sup>1,2,5</sup>

4 **Affiliations:**

5 <sup>1</sup>College of Science and Engineering, James Cook University, Townsville, Queensland 4811  
6 Australia

7 <sup>2</sup>ARC Centre of Excellence for Coral Reef Studies, James Cook University, Townsville,  
8 Queensland 4811 Australia

9 <sup>3</sup>Hawai'i Institute of Marine Biology, University of Hawai'i at Mānoa, 46-007 Lilipuna Rd,  
10 Kaneohe, Hawai'i 96744 USA

11 <sup>4</sup>Centre for Biological Diversity, Scottish Oceans Institute, University of St. Andrews, St.  
12 Andrews KY16 9TH UK

13 <sup>5</sup>Naos Marine Laboratories, Smithsonian Tropical Research Institute, Ancón, Panamá

14

15 **Keywords:** coexistence, nonlinearity, wave disturbance, environmental variability

16

17 **Corresponding author:**

18 Mariana Álvarez-Noriega

19 Centre for Geometric Biology, School of Biological Sciences Monash University,  
20 Melbourne, VIC, Australia 3800

21 [mariana.alvareznoriega@monash.edu](mailto:mariana.alvareznoriega@monash.edu)

22

23

24

25 **Abstract**

26 Reef-building coral assemblages are typically species-rich, yet the processes maintaining  
27 coral biodiversity remain poorly understood. Disturbance has long been believed to promote  
28 coral species coexistence by reducing the strength of competition. However, such  
29 disturbance-induced effects have since been shown to be insufficient on their own to prevent  
30 competitive exclusion. Nevertheless, Modern Coexistence Theory has revealed other  
31 mechanisms by which disturbance and, more generally, environmental variation can favour  
32 coexistence. Here, we formulate, calibrate, and analyze a size-structured, stochastic coral  
33 competition model using field data from two common colony morphologies. These two coral  
34 morphologies, tabular and digitate, differ in their size-dependent vulnerability to  
35 dislodgement caused by wave action. We confirm that fluctuations in wave action can  
36 promote coral species coexistence. However, using a recently proposed partitioning  
37 framework, we show that, contrast to previous expectations, temporal variability in strength  
38 of competition did not promote coexistence. Instead, coexistence was enabled by differential  
39 fluctuations in size-dependent mortality among competitors. Frequent and intense  
40 disturbances resulted in monocultures of digitate corals, which are more robust to wave  
41 action than tabular corals. In contrast, infrequent or weak disturbances resulted in  
42 monocultures of tabular corals. Coexistence was only possible under intermediate levels of  
43 disturbance frequency and intensity. Given the sensitivity of coexistence to disturbance  
44 frequency and intensity, anthropogenic changes in disturbance regimes are likely to affect  
45 biodiversity in coral assemblages in ways that are not predictable from single population  
46 models.

47

48

49

## 50 **Introduction**

51 Reef-building coral assemblages are an example of the ‘paradox of the plankton’  
52 (Hutchinson 1961): they can be species-rich, even though species compete for a small  
53 number of limiting resources, mainly space, light, and nutrients in the water column.  
54 However, the processes maintaining such high biodiversity remain enigmatic (Tanner *et al.*  
55 1994; Bellwood & Hughes 2001). A classical explanation for reef coral coexistence, the  
56 intermediate disturbance hypothesis (IDH), involves the periodic reduction, by disturbances,  
57 in densities of dominant competitors, which frees up space for colonisation by weaker  
58 competitors (Connell 1978; Aronson & Precht 1995). However, the IDH’s theoretical validity  
59 has been challenged because the weakening of competition in the presence of disturbance is  
60 not sufficient to promote coexistence (Chesson & Huntly 1997; Fox 2013). Long-term  
61 coexistence requires that competition operates in such a way that individuals experience  
62 progressively less competition, on average, as they become rare, so that they tend to recover  
63 from excursions to low density. While disturbance cannot promote coexistence solely by  
64 weakening competition, it produces environmental fluctuations that under some  
65 circumstances can promote coexistence (Roxburgh *et al.* 2004).

66 Environmental fluctuations can favour coexistence when population growth rate  
67 responds nonlinearly or sub-additively to these environmental fluctuations or competition. A  
68 sub-additive response to the environment and competition means that population growth rate  
69 is reduced less by competition when a species is experiencing an unfavourable environment  
70 than when it is experiencing a favourable one. The higher cost of competition during  
71 favourable times acts as an upper bound to population growth, while the lower cost during  
72 unfavourable times acts as a lower bound. The coexistence mechanism acting via competitive  
73 and environmental sub-additivity is called the *storage effect* (Chesson & Warner 1981;  
74 Chesson 2000), which is known to operate in many ecological assemblages (e.g., (Cáceres

75 1997; Adler *et al.* 2006; Angert *et al.* 2009)). However, covariation between other factors or  
76 demographic rates affecting population growth can also impact coexistence (Ellner *et al.*  
77 2019).

78         When population growth rate responds nonlinearly to competition, the average  
79 population growth can either be boosted or depressed by fluctuations in competition relative  
80 to a constant environment at the mean competition (Armstrong & McGehee 1980) (i.e.,  
81 *relative nonlinearity of competition*; (Chesson 2000)). Coexistence is possible when the  
82 inferior competitor under average conditions gets a larger benefit from fluctuations in  
83 competition than does the superior competitor, and each population, when abundant, creates  
84 the conditions that favour its competitor. Coexistence via nonlinear averaging has not  
85 received as much attention as the storage effect, despite being more important than non-  
86 additivity under some conditions (e.g., (Miller *et al.* 2011; Letten *et al.* 2018)). Moreover,  
87 until very recently, coexistence via nonlinear averaging was thought to act exclusively via  
88 nonlinearities in the population growth rate's response to competition, however nonlinear  
89 responses to other factors, such as the environment, can also promote coexistence (Ellner *et*  
90 *al.* 2019).

91         In coral assemblages, hydrodynamic disturbances strongly affect assemblage structure  
92 (Connell *et al.* 2004), mainly by imposing mortality pulses that affect top-heavy colonies  
93 more than bottom-heavy ones (Madin & Connolly 2006a). Consequently, susceptibility to  
94 wave action is morphology- and size-dependent (Massel & Done 1993; Madin & Connolly  
95 2006a; Madin *et al.* 2014). Since top-heavy colonies, such as those of species with a tabular  
96 morphology, tend to grow faster than bottom heavy colonies (Dornelas *et al.* 2017) and can  
97 monopolize space on the reef crest in the absence of hydrodynamic disturbances (Baird &  
98 Hughes 2000), periodic hydrodynamic disturbances have long been thought to prevent the  
99 exclusion of bottom-heavy competitors (Connell 1978). Moreover, because top-heavy

100 colonies increase in susceptibility to mechanical dislodgement with increasing colony size,  
101 storms affect the largest, most fecund sizes disproportionately, further affecting superior  
102 competitors. Therefore, the effect of hydrodynamic disturbances on coexistence acts in two  
103 ways: clearing space for larvae to settle and altering, not just the relative number of colonies  
104 of each competitor, but also the populations' size structures. While the presence of periodic  
105 disturbance is not sufficient to promote coexistence (Chesson & Huntly 1997; Fox 2013), if a  
106 competitors' population growth rates respond nonlinearly or non-additively to factors (e.g.,  
107 competition) or demographic rates (e.g., survival) that fluctuate with disturbance, disturbance  
108 could promote coexistence between coral morphologies.

109         Here, we calibrated a competition model using field demographic data for two  
110 common coral morphologies (Madin *et al.* 2014; Álvarez-Noriega *et al.* 2016; Dornelas *et al.*  
111 2017) and simulated hydrodynamic disturbances using a local 37-year wind record. Using  
112 model simulations, we first investigated whether or not coexistence was possible in the  
113 presence of hydrodynamic disturbance. Then, having found that it was, we identified the  
114 fluctuation-dependent mechanisms responsible for coexistence by decomposing competitors'  
115 population growth rates into contribution from each of the different fluctuating components:  
116 competition, size structure, and the interaction between the two. We chose tabular *Acropora*  
117 as the model morphology for corals that are fast growing, good competitors that are highly  
118 susceptible to disturbance, and digitate *Acropora* as the model morphology for slower  
119 growing, more mechanically robust corals. These two morphologies are very common in the  
120 wave-exposed habitats of highly diverse Indo-Pacific reefs (Done 1982; Dornelas &  
121 Connolly 2008).

122

123 **Results and Discussion**

124           In our model, coexistence of tabular and digitate corals was only possible in the  
125   presence of hydrodynamic disturbance (Fig. 1). In a variable environment, both competitors  
126   had a positive population growth rate when they were rare and the other competitor was a  
127   resident (Fig. 1-a & b). This implies that if the population of either competitor reaches very  
128   low densities, it will be able to recover and avoid extinction in the presence of the other  
129   competitor, which is abundant (or at least at its long-term abundance in monoculture).  
130   However, in a constant environment, one of the competitors was unable to recover from low  
131   densities (Fig. 1-c & d). Indeed, with our model, we find no region of parameter space where  
132   coexistence could occur in the absence of fluctuations (see Methods). To investigate the  
133   mechanism by which hydrodynamic disturbance was driving coexistence, we isolate the  
134   effects of the different sources of fluctuations in our model on invader growth rate. We  
135   quantified the approximate contribution of the two main fluctuating factors affected by wave  
136   action: competition (i.e., proportion of free space) and size-dependent mortality due to  
137   disturbance, as well as the additional contribution of both factors fluctuating together (i.e.,  
138   their interaction). To do this, we used a recent quantitative framework (Ellner *et al.* 2019)  
139   that relies on simulations rather than mathematical approximations, thus allowing for higher  
140   model complexity than previous frameworks (e.g.,(Chesson 1994)).  
141

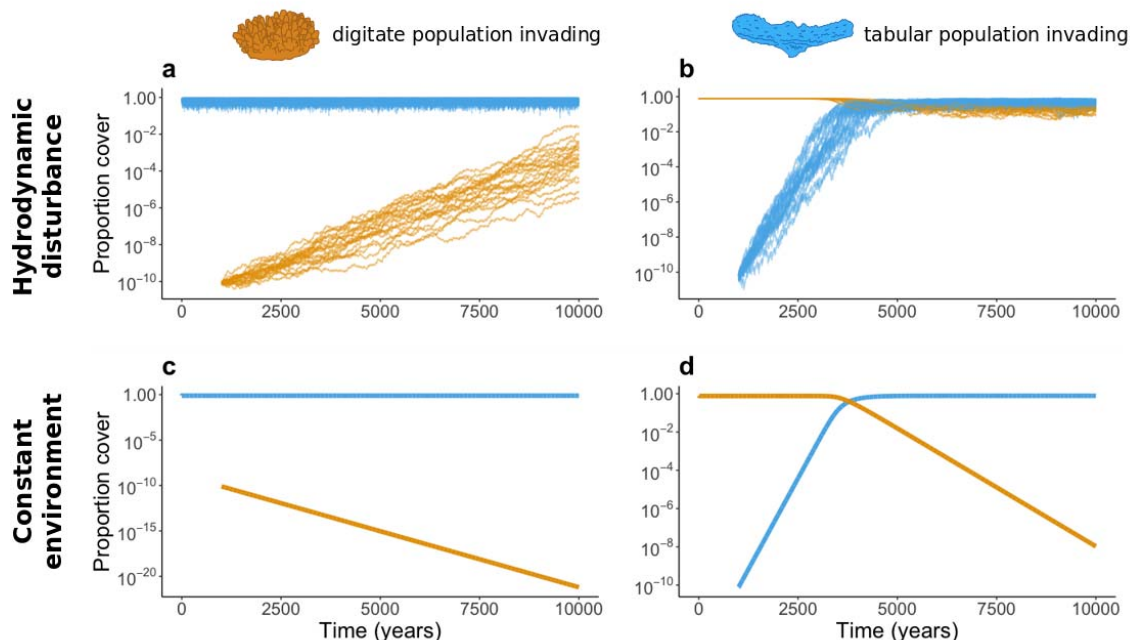

142

143 **Figure 1.** Proportion of space occupied through time following an invasion. The trajectories  
144 of the digitate and tabular populations are in orange and blue, respectively. Panel a- Digitate  
145 population invading a tabular resident in the presence of environmental fluctuations. Panel b-  
146 Tabular population invading a digitate resident in the presence of environmental fluctuations.  
147 Panel c- Digitate population invading a tabular resident at the mean size-dependent survival  
148 rates (constant environment). Panel d- Tabular population invading a digitate resident at the  
149 mean size-dependent survival rates (constant environment). Note that the scale is different in  
150 Panel c. In panels a & b, each line represents one simulation (out of 20), in panels c & d, all  
151 simulations follow the same trajectory. These simulations were run for 10,000 years (with  
152 invasion after 2000 years) to show the full dynamics of invasion, but were run only for 2300  
153 years (300 years following invasion) for all other analyses.  
154

155 Contrary to the prevailing understanding of how disturbance promotes coexistence,  
156 fluctuations in free space actually had a coexistence-inhibiting effect (i.e., a negative effect  
157 on the invader growth rate; Fig. 2-a, Fig. S6), relative to the constant free space model where  
158 average free space from the stochastic simulation was imposed every year. Rather, invasion  
159 and establishment of the digitate population depended on the beneficial effect of fluctuations  
160 in size structure caused by differences in size-dependent susceptibility to disturbance (which  
161 was the only term  $>0$  for the digitate population; Fig. 2-a). The positive contribution of  
162 fluctuations in size structure counteracted the negative effects of fluctuations in free space  
163 and size structure varying jointly on the digitate population's invasion growth rate.

164 Conversely, the invasion growth rate of the tabular population was positive solely because it  
165 had a positive per-capita growth rate under average conditions (Fig. 2-b). Since the digitate  
166 population was not vulnerable to hydrodynamic dislodgment, fluctuations were negligible  
167 when this population was dominant, and therefore did not affect population growth.  
168

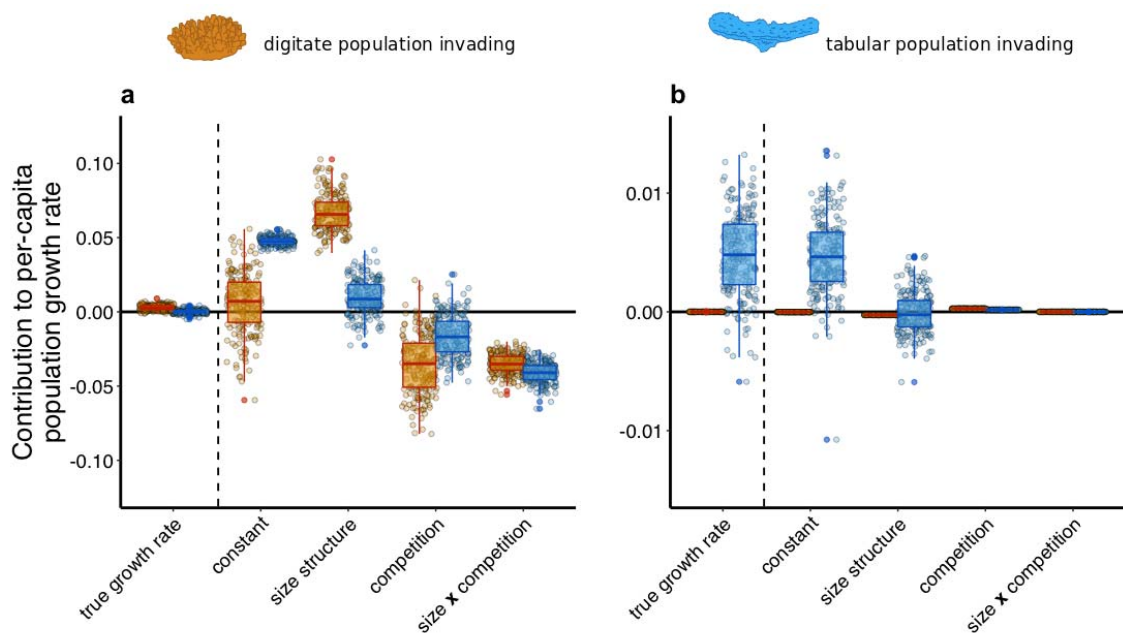

169

170 **Figure 2.** Partitioning the contributions to per-capita population growth ( $r$ ). Contribution of  
171 the different sources of variation to mean population growth rate ('true population growth')  
172 following Ellner et al. 2019 (Ellner *et al.* 2019) when a digitate population invades a tabular  
173 resident (Panel a), and when a tabular population invades a digitate resident (Panel b).  
174 *Constant* refers to the population growth rate at mean values of free space and competitors'  
175 size structures. *Size structure* represents the contribution of fluctuations in size structure to  
176 population growth rate when competition is constant (at its mean value). Similarly,  
177 *competition* represents the contribution of fluctuations in the amount free space when size  
178 structures are fixed at their mean values for each competition. *Size structure* and *competition*  
179 are the main effects. *Size x competition* represents the contribution of the simultaneous  
180 fluctuation of competition and size structure that is independent of their main effects. The  
181 true population growth rate is the sum of *constant*, *size structure*, *competition*, and *size x*  
182 *competition*, and it is equal to the mean population growth rate when size structure and  
183 competition fluctuate ( ). See methods for more details. The digitate and tabular populations  
184 are represented by orange and blue colours, respectively. Each point represents the one  
185 simulation (200 simulations in total), and the box plots show their distribution.  
186

187



188

189

190

191

192

193

194

195

196

197

198

199

200

201

202

203

204

205

206

207

208

209

210

211

212

213

To understand how environmental fluctuations induced a stabilizing coexistence

effect, it is important to recognize that each species was favoured at different levels of

environmental variation. Hydrodynamic disturbance increased the digitate population's

growth rate, while the tabular population performed best when environmental variation was

low (i.e., under average conditions). When abundant, each population created the conditions

that favoured its competitor, allowing the latter to increase in abundance. When the digitate

population was rare, the high abundance of tabular corals induced large fluctuations in

competition – specifically, via the dislodgment of large tabular corals, and an associated

reduction in reproductive output of the tabular population – which favoured the digitate

population. Conversely, when the tabular population was rare and the mechanically-stable

digitate population was abundant, resource fluctuations were minimal. This favoured tabular

corals, whose per-capita population growth rate was higher at the mean resource level, as

well as in the absence of disturbance. These dynamics are consistent with empirical

observations. Tabular corals grow faster than digitate corals (Dornelas *et al.* 2017) and reach

larger colony sizes that are very fecund (Álvarez-Noriega *et al.* 2016). In periods of low

hydrodynamic disturbance, tabular species can dominate the reef crest (Baird & Hughes

2000). However, hydrodynamic disturbances affect the large, very fecund, tabular colonies

most strongly (Madin & Connolly 2006a) and, consequently, the relative abundances of

digitate corals tend to increase after disturbances that dislodge tabular corals (Muko *et al.*

2013). Our findings are also consistent with changes in the relative abundance between

species following disturbance in the Caribbean (Aronson & Precht 1995) and the recovery of

species richness following strong hydrodynamic disturbance on the GBR (Connell *et al.*

2004).

According to the IDH (Connell 1978), coexistence should be more likely at

intermediate levels of disturbance because high disturbance eliminates susceptible species,

214 while low disturbance allows dominant competitors to exclude inferior ones. Sensitivity  
215 analysis indicates that fluctuation-dependent coexistence creates such a relationship in our  
216 model: if disturbance is weak or very infrequent, the tabular population outcompetes the  
217 digitate population; if disturbance is very frequent, the digitate population outcompetes the  
218 tabular population (Fig. 3-a). Coexistence was possible for a wide range of disturbance  
219 frequencies and intensities but, as expected, the more intense the disturbance, the less  
220 frequent it could be and vice-versa. Once disturbance was sufficiently intense to dislodge  
221 most of the digitate colonies (i.e. only the largest sizes would survive; Fig. 3-b), the digitate  
222 population was again unable to invade a tabular resident, despite most tabular colonies being  
223 dislodged too (Fig. 3- a & b). This occurred because the rapid growth of surviving small  
224 tabular colonies favoured their population recovery over that of digitate populations, for  
225 extreme disturbance regimes that dislodged even digitate colonies.

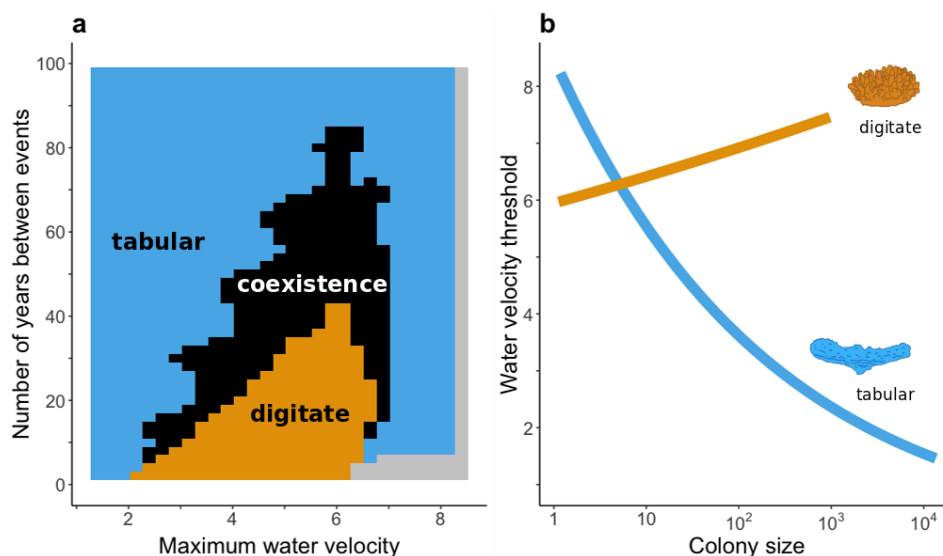

227 **Figure 3.** Effect of frequency and intensity of disturbance on species coexistence. Panel a-  
228 Competitive outcomes depending on the intensity (maximum water velocity;  $\text{ms}^{-1}$ ) and  
229 frequency (number of years between disturbance events) of disturbance. Colours indicate  
230 combinations of competitive outcomes: the digitate population outcompetes the tabular  
231 population in orange areas, the tabular population outcompetes the digitate population in blue  
232 areas, in grey areas both competitors go extinct, and coexistence is possible in black areas.  
233 Panel b- Minimum water velocity required to dislodge a colony depending on colony size  
234 ( $\text{cm}^2$ ) (estimates are from (Madin *et al.* 2014)). The orange line shows the relationship for the  
235 digitate colonies and the blue line shows the relationship for the tabular colonies.

236           The contribution of nonlinear responses of population growth rates to coexistence has  
237 received considerably less attention than the contribution of nonadditive responses (mainly  
238 the storage effect). Nonlinear responses to coexistence were initially thought to be more  
239 limited than for the latter (Chesson 1994), although recent studies suggest otherwise (Letten  
240 *et al.* 2018; Hallett *et al.* 2019; Zepeda & Martorell 2019). Importantly, the contribution of  
241 nonlinear responses to coexistence was thought to be limited to competition (e.g., (Chesson  
242 1994, 2000)) until very recently (Ellner *et al.* 2019). In our model, fluctuations in competition  
243 were limiting, rather than promoting, coexistence (Fig. 2-a). Since coral demographic rates  
244 are tightly linked with colony morphology (Madin *et al.* 2014; Álvarez-Noriega *et al.* 2016),  
245 we expect our results to hold for competition between any species of these morphologies.  
246 Tabular and digitate corals of the genus *Acropora* have a widespread distribution across the  
247 Indo-Pacific and are abundant in wave-exposed reef environments (Done 1982). More  
248 broadly, our findings highlight the potential for nonlinear responses in population growth rate  
249 to promote coexistence whenever differences in mechanical stability produce differential  
250 fluctuations in size structure, as long as those fluctuations disadvantage the population with  
251 the higher intrinsic growth rate under average conditions. Because overtopping growth forms  
252 tend to be both fast-growing and mechanically unstable (Jackson 1979), nonlinearities are  
253 likely to play a role in competition involving species with these growth forms.

254           Disturbance has long been thought to be an important contributor to coral species  
255 coexistence (Connell 1978), but the lack of a mechanism has made this idea controversial in  
256 recent years (Chesson & Huntly 1997; Fox 2013). We show that environmental fluctuations  
257 can promote coexistence of species that differ in their size-dependent susceptibility to  
258 disturbance, limiting the ability of superior competitors to form monocultures and exclude  
259 inferior competitors. While other mechanisms are likely to operate to promote coexistence in  
260 coral assemblages (including spatial heterogeneity (Hoogenboom *et al.* 2011) and

261 asymmetries and fluctuations in metapopulation connectivity (Salomon *et al.* 2010)), the fact  
262 that hydrodynamic disturbances' transient effects on coral assemblages are large in  
263 magnitude and consistent with the model analysed here suggests that the contribution made  
264 by hydrodynamic disturbance to coexistence in wave-exposed habitats with fast-growing,  
265 top-heavy coral species might be substantial. If so, anthropogenic changes that alter  
266 hydrodynamic disturbance regimes (Knutson & Tuleya 2004) or species' skeletal densities  
267 and therefore their vulnerability to mechanical disturbance (Madin *et al.* 2012) are likely to  
268 affect coral assemblages in ways that will not be captured by commonly used methods of  
269 projecting reef futures, which either consider coral cover to be a single population, or which  
270 aggregate the projections of single-species models. Moreover, size-dependent responses to  
271 the environment are common in nature (Tredennick *et al.* 2018), and are likely to vary among  
272 species. For instance, trees differ in their size-dependent response to drought (Zang *et al.*  
273 2012) and size-dependent fishing pressure affects fish species differently (Genner *et al.*  
274 2010). Consequently, effects of episodic mortality agents on coexistence via nonlinearities in  
275 population growth rates are likely to be more widespread in nature than currently recognised.

276

## 277 **Methods**

278

### 279 Analysis overview

280 First, we specified the competition model and parameterised demographic rates and the  
281 disturbance regime. Then, we did an invasibility analysis in the presence of environmental  
282 fluctuations to test whether coexistence was possible, and we compared it to an invasibility  
283 analysis in a constant environment to investigate if coexistence was mediated by  
284 environmental fluctuations. After determining that coexistence was fluctuation-dependent,  
285 we decomposed population growth rate into the contribution of: 1) demographic rates at

286 constant (average) conditions, 2) fluctuating size structures, 3) fluctuating competition  
287 (proportion of occupied space), and 4) joint fluctuation of competition and size structures.  
288 Finally, to test whether competitive outcomes were dependent on the strength and frequency  
289 of the disturbance regime, we did invasibility analyses over a range of wind intensities and  
290 frequencies. See Figure S1 for a diagrammatic summary of our approach. We explain each  
291 step in detail below.

292

### 293 Competitive model specification

294 We used integral projection models (Easterling *et al.* 2000) (IPMs) to characterise  
295 community dynamics. In the model, demographic processes over each year were divided into  
296 two sub-intervals: from time  $t-1$  to time  $t-h$  (where  $h \in [1 - z, 1)$  and  $z \rightarrow 0$ ), when  
297 reproduction and larval settlement occurred, and 2) from time  $t-h$  to time  $t$ , when disturbance,  
298 growth, and survival occurred. In other words, reproduction occurred before growth and  
299 survival. We adopted this approach because settlement usually peaks shortly (1-2 weeks)  
300 after spawning (Miller & Mundy 2003; Nozawa & Harrison 2008), and thus most growth and  
301 mortality of established corals would occur outside this interval. Because coral recruitment is  
302 proportional to unoccupied space (Connell *et al.* 1997), we modelled the proportion of larvae  
303 successfully recruiting as depending linearly on free space availability  $1 - \sum_{j=1}^2 N_{j,t}$ , where  $N_{j,t}$  is  
304 the proportion of space occupied by species  $j$  at time  $t$ .  $N_{j,t}$  was calculated by integrating the  
305 density of colonies of size  $y$  at time  $t$  ( $n_j(y, t)$ ) times their planar area, and then normalizing by  
306 the total habitat area ( $A$ ):

$$307 \quad N_{j,t} = \frac{\int y [n_j(y, t)] dy}{A}.$$

308 (Eq. 1)

309 The density of colonies of size  $x$  at time  $t-h$  for species  $j$  ( $n_j(x, t-h)$ ) was the sum of (i)  
310 the density of colonies of size  $x$  just before settlement ( $n_j(x, t-1)$ ) and (ii) the density of

311 successful settlers of size  $x$  at time  $t-h$  produced through reproduction of colonies of size  $x$  at  
312 time  $t-1$ . The number of possible settlers was given by the integral of the fecundity kernel  
313 ( $F_j(x, x')$ ) times the size distribution at time  $t-1$  ( $n_j(x, t-1)$ ). The fecundity kernel was a surface  
314 containing transitions from a parent of size  $x$  at time  $t-1$  to an offspring of size  $x'$  at time  $t-h$ ,  
315 and thus it implicitly included reproductive output, larval survival, and successful settlement.  
316 With the above assumptions, the density of successful settlers was:

$$317 \quad R_j(x', t-h) = (1 - \sum_{i=1}^k N_{i,t-1}) \int_0^\infty F_j(x, x') n_j(x, t-1) dx.$$

318 (Eq. 2)

319 The size distribution at time  $t-h$  was then:

$$320 \quad n_j(x', t-h) = n_j(x', t-1) + R_j(x', t-h).$$

321 (Eq. 3)

322 In the second sub interval ( $t-h$  to time  $t$ ), the model predicted growth and survival of  
323 all corals (including those newly recruited) and the proportion of space occupied by each  
324 species was calculated ( $N_j$ ). Survival from time  $t-h$  to time  $t$  ( $S_{j,t-h}(x')$ ) had two components: a  
325 stochastic component that depends on susceptibility to the strongest yearly mechanical  
326 disturbance ( $D_{j,t-h}(x')$ ), and a deterministic component that represents ‘background’ mortality  
327 ( $M_j(x')$ ; i.e. mortality independent of mechanical disturbance):

$$328 \quad S_{j,t-h}(x') = (1 - D_{j,t-h}(x')) (1 - M_j(x')).$$

329 (Eq. 4)

329 The distribution of colonies of size  $y$  at time  $t+1$  depended on the survival of colonies  
330 of size  $x$  ( $S_{j,t-h}(x)$ ) and their size-dependent growth to colony size  $y$  ( $G_j(x, y)$ ) from time  $t-h$  to  
331 time  $t$ :

$$332 \quad n_j(y, t) = \int_0^\infty [S_{j,t-h}(x') G_j(x', y)] n_j(x', t-h) dx'.$$

333 (Eq. 5)

334 We modelled growth as density-independent, because no effect of competition on colony  
335 growth could be detected for the modelled species at the site (Álvarez-Noriega *et al.* 2018).  
336 Specifically, growth was modelled as a linear function of size on a logarithmic scale  
337 ( $y_i \sim \beta_0 + \beta_1 x'_i + \varepsilon_i$ ) using published data from the study site (Dornelas *et al.* 2017).

338

### 339 Parameter estimation

340 Model parameters are defined in the extended data (Table S1).

341 Growth, fecundity, and background mortality were obtained from a 5-yr data set of 30  
342 colonies per species on the reef crest of Lizard Island, northern Great Barrier Reef  
343 (14.699839°S, 145.448674°E). Parameter estimates were obtained from previously-published  
344 analyses of these data (Madin *et al.* 2014; Álvarez-Noriega *et al.* 2016; Dornelas *et al.* 2017),  
345 and are reported in the **R** scripts for this paper, which will be publicly available in Github  
346 upon publication. For each growth form, demographic data of two species -*Acropora*  
347 *hyacinthus* and *Acropora cytherea* for tabular corals and *Acropora cf. digitifera* and  
348 *Acropora humilis* for digitate corals- were pooled for analysis (Fig. S2). *Acropora hyacinthus*  
349 and *A. cf. digitifera* were among the most abundant coral species at the site (Dornelas &  
350 Connolly 2008). Previous analyses indicate that growth, mortality, and fecundity all vary  
351 substantially more between growth forms than between species of the same growth form  
352 (Madin *et al.* 2014; Álvarez-Noriega *et al.* 2016; Dornelas *et al.* 2017).

353 The fecundity function ( $F_j(x, x')$ ) for species  $j$  depended on: the size-dependent  
354 probability of a polyp being mature ( $p_{j,x}$ ), the size-dependent number of oocytes per mature  
355 polyp ( $m_{j,x}$ ), the number of polyps per projected unit area ( $\rho_j$ ), the projected area of the  
356 colony ( $a_j$ ) and the settlement probability ( $q_j$ ):

$$357 F_j(x, x') = p_{j,x} m_{j,x} \rho_j a_j q_j.$$

358

(Eq. 6)

359           The settlement probability included the probability of an egg being fertilised and  
360    becoming a larva, and the probability of that larva successfully settling. Since larval mortality  
361    is density-independent and per-capita settlement, if affected at all, is positively affected by  
362    higher larval densities(Heyward *et al.* 2002; Edwards *et al.* 2015; Doropoulos *et al.* 2017,  
363    2018), we assumed no competition among larvae (i.e., successful recruitment depended on  
364    unoccupied space, but not on the density of offspring seeking to settle).

365           All terms in eq. (6) except for settlement probability were obtained from Álvarez-  
366    Noriega *et al.* (2016)(Álvarez-Noriega *et al.* 2016). Since there is no information available on  
367    settlement probability, we fixed a value resulting in average coral cover of about 75% of each  
368    morphology in the absence of competitors and in the presence of disturbance. However, we  
369    considered a range of values of this parameter to ensure that settlement probabilities resulting  
370    in lower average coral cover yielded consistent results (i.e., coexistence by RNC in the  
371    presence of environmental fluctuations; no coexistence possible without fluctuations).

372           Mortality due to mechanical disturbance was determined by comparing each colony's  
373    'Colony Shape Factor' (CSF) to the 'Dislodgment Mechanical Threshold' (DMT) imposed  
374    by the yearly maximum hydrodynamic disturbance. Both quantities were derived by Madin  
375    and Connolly (Madin & Connolly 2006b), and field-tested on Lizard Island, at a reef adjacent  
376    to our study site. When the DMT of an event exceeds the CSF of a colony, the colony is  
377    predicted to be dislodged.

378           In each year of the simulation, a random wind velocity was drawn from a gamma  
379    distribution ( $\alpha=2.18$ ,  $\beta=0.35$ ), with parameters estimated from the distribution of a 37-year  
380    wind velocity data for the Low Isles (16.383°S, 145.567°E) (from the Australian Bureau of  
381    Meteorology), approximately 180 km south of Lizard Island (Madin *et al.* 2006). Water  
382    velocity at the reef crest as a function of wind velocity was estimated using wind and water  
383    velocity at the reef crest collected at the site(Madin *et al.* 2006). We predicted water velocity,



384  $u$ , as a saturating function of wind velocity,  $v$ , because wave energy is limited by fetch and  
385 depth:

$$u = a(1 - e^{-bv}),$$

386 (Eq. 7)

387 where  $a$  and  $b$  are fitted parameters, estimated by least-squares estimation ( $a= 5.10$ ,  $b= 0.04$ ;  
388 Fig. S3). Using previously calibrated relationships between colony size and CSF for our  
389 study species at Lizard Island (Madin *et al.* 2014), colonies were predicted to dislodge if the  
390 DMT imposed by the yearly maximum wind velocity was smaller than the colony's estimated  
391 CSF (Madin & Connolly 2006b). Since dislodged colonies have very low survival rates  
392 (Smith & Hughes 1999), colony dislodgement was assumed to cause colony mortality.

393 Background mortality (mortality independent of mechanical disturbance) was  
394 estimated from mortality data from 2009-2012 (Madin *et al.* 2014). CSF for each individual  
395 colony was estimated and compared to the maximum dislodgement mechanical threshold  
396 imposed by the environment that year (estimated from wind data at the site(Australian  
397 Institute of Marine Science 2017)). As predicted by theory (Madin & Connolly 2006b) and  
398 validated with mortality data on the reef (Madin *et al.* 2014), colonies that had CSF larger  
399 than the DMT estimated for that year were assumed to have been dislodged. Colonies  
400 predicted to dislodge were assumed dead and were removed from the data set from which  
401 background mortality was estimated. With the remaining data, two linear models with a  
402 binomial error structure were fitted for each growth form: one with colony area as an  
403 explanatory variable (log-scale) and one independent of colony area. Models were compared  
404 using AIC, and the best-fit model for each growth form was used in the simulations (Tables  
405 S2-S3; Figs. S4-S5).

406  
407 Analysis of coexistence  
408

409 Partitioning the contribution of the fluctuation-dependent mechanisms using  
410 analytical solutions for quadratic approximations (Chesson 1994) is unfeasible in complex  
411 models (e.g. multiple-step, stage/size-dependent models); therefore, we estimated terms  
412 needed for the analytical solution via simulations.

413 Overall, the finite rate of increase in cover of species  $j$  between time  $t-1$  and time  $t$   
414 ( $\lambda_j(t)$ ) in terms of proportion of occupied space (i.e. the factor by which the proportion of  
415 space occupied by species  $j$  changes) is:

$$\lambda_j(t) = \frac{N_{j,t}}{N_{j,t-1}} \quad (\text{Eq. 8})$$

416 and the overall specific population growth rate ( $r_j(t)$ ) is:

$$r_j(t) = \ln [\lambda_j(t)]. \quad (\text{Eq. 9})$$

420

421

#### 422 Decomposing growth rate into contributions from different sources of variation

423 We follow Ellner et al. (Ellner *et al.* 2019) to decompose mean population growth rate of  
424 each species ( $\bar{r}_j$ ) into population growth rate at mean conditions ( $\varepsilon_j^0$ ), the contribution of  
425 fluctuations in competition ( $\bar{\varepsilon}_j^c$ ), fluctuations in size-structure ( $\bar{\varepsilon}_j^s$ ), and the interaction  
426 between fluctuating competition and size-structure ( $\bar{\varepsilon}_j^{wc}$ ):

$$\bar{r}_j = \varepsilon_j^0 + \bar{\varepsilon}_j^w + \bar{\varepsilon}_j^c + \bar{\varepsilon}_j^{wc}. \quad (\text{Eq. 18})$$

428 The approach involves computing population growth under different scenarios: one where all  
429 varying factors are allowed to fluctuate, and one for each possible combination of one of  
430 more of the varying factors fixed at its mean value from the stochastic simulations. The

431 population growth rates from the different scenarios are compared to quantify the  
432 contribution of each factor varying on its own and in combination with other factors.

433 First, a simulation was run in which one population was introduced at a coral cover  
434  $<10^{-9}$  in a system where the competitor had been resident for 2000 years; the simulation ran  
435 for 300 years after the invasion. In this first simulation (the baseline simulation), wind  
436 velocities were randomly drawn from the gamma distribution fitted to the wind velocity data  
437 at Low Isles; from this simulation we estimated  $\bar{r}_j$  as the mean population growth of species  $j$   
438 from 50 years after the invasion to the end of the simulations. Competition ( $c$ ), and size-  
439 structure ( $w$ ) (both  $n(x', t - h)$  and  $n(y, t + 1)$ ) were recorded for each year of the  
440 simulation ( $c_t^*$  and  $w_{j,t}^*(x)$ ), where  $w_{j,t}(x)$  is the size distribution of colony sizes of species  $j$   
441 at time  $t$  (normalized to integrate to unity) and  $c_t$  is the proportion of free space at time  $t$ ; the  
442 asterisks indicates values for the baseline simulation. Using these values, we then calculated  
443 their temporal averages  $\bar{w}_j(x)$  and  $\bar{c}$  and ran a simulation in which  $w_{j,t}(x)$  and  $c_t$  were fixed  
444 at those mean values to estimate  $\varepsilon_j^0$  ( $\varepsilon_j^0 = \frac{1}{T-I} \sum_{t=I}^T r_j(\bar{w}(x), \bar{c})$ , where  $I$  is time after 50 years  
445 after the invader was introduced ( $I=2050$ ; to be consistent with the previous growth rate  
446 decomposition) and  $T$  is time at the end of the simulations ( $T=2300$ ); i.e. the mean population  
447 growth calculated for this set of simulations). To maintain a constant size structure, the total  
448 number of colonies of species  $j$  at time  $t$  were summed and the corresponding proportion was  
449 allocated to each size to match the temporal average size structure from the stochastic  
450 simulations ( $\bar{w}(x)$ ). Here, the proportion of free space was fixed at  $\bar{c}$  during all years of the  
451 simulation. To calculate  $\bar{\varepsilon}_j^w$ , another simulation was run where  $c_t = \bar{c}$ , but the size-structures  
452 were set at the value recorded for the baseline simulation ( $w_{j,t}(x) = w_{j,t}^*(x)$ ).  $\bar{\varepsilon}_j^w$  was the  
453 effect of fluctuations in size-structure on population growth, independent of the effect of  
454 mean size-structure ( $\bar{\varepsilon}_j^w = \frac{1}{T-I} \sum_{t=I}^T r_j(w_{j,t}(x), \bar{c}) - \varepsilon_j^0$ ). Similarly,  $\bar{\varepsilon}_j^c$  (where  $w_{j,t}(x) = \bar{w}_j(x)$ )

455 and  $c_t = c_t^*$ ) was estimated as the effect of competition independent of the effect of its mean  
456 (Table S4 for all the relevant formulas). The interaction between  $w$  and  $c$  ( $\bar{\varepsilon}_j^{wc}$ ), was the  
457 effect of both  $w_{j,t}(x)$  and  $c_t$  varying together ( $w_{j,t}(x) = w_{j,t}^*(x)$  and  $c_t = c_t^*$ ), independent of  
458 the effects of mean size-structure and mean competition, and of size-structure and  
459 competition fluctuating on their own:  $\bar{\varepsilon}_j^{wc} = \frac{1}{T-I} \sum_{t=I}^T r_j(w_t(x), c_t) - \bar{\varepsilon}_j^w - \bar{\varepsilon}_j^c - \varepsilon_j^0 \cdot \bar{r}_j$  was then  
460 defined according to Eq. (18).

461

#### 462 Sensitivity analysis: Coexistence under different disturbance frequency-intensity regimes

463 To investigate the combinations of wave disturbance frequency and intensity that allowed  
464 tabular and digitate populations to coexist, we simulated invasions of both competitors under  
465 a range of water velocities (i.e. disturbance intensity) with a range of years between  
466 disturbances (frequencies). Water velocity ranged from 1.4 (no colonies are dislodged) to 8.5  
467  $\text{ms}^{-1}$  (all colonies are dislodged), in  $0.25\text{ms}^{-1}$  increments; the number of years between  
468 disturbances ranged from zero to 100 years in increments of 2 years. Before each invasion,  
469 2000 years of simulations were run to allow the resident to reach a stable range of coral  
470 cover; after each invasion, 300 years more of community dynamics were simulated.  
471 Coexistence was possible if both competitors -as invaders- had a higher mean proportion of  
472 space cover in the last 100 years of the simulation than in the 100 years following the  
473 invasion ( $\frac{1}{100} \sum_{t=2201}^{2300} N_{i,t} > \frac{1}{100} \sum_{t=2002}^{2101} N_{i,t}$ ). If this was true for the tabular population, but  
474 not for the digitate, the tabular population was assumed to dominate; conversely, the digitate  
475 population was assumed to dominate when it was able to invade a tabular population, but the  
476 tabular population was not able to invade a digitate resident. See supplementary material for a  
477 stochastic version of this analysis.

478

479 All simulations were done in R (R Core Team 2018) (version 3.5.2).

480

481

## 482 **Acknowledgments**

483 We thank R. Aronson, P. Adler, and A. Álvarez-Noriega for helpful comments on an earlier  
484 version of this work, and D. Falster for valuable advice. **Funding:** MD was supported by the  
485 ERC (BioTIME 250189), the Scottish Funding Council (MASTS –HR09011) and a  
486 Leverhulme Trust Fellowship. JM, AB and SC were supported by the Australian Research  
487 Council (ARC) (FT110100609, FT0990652 and DP0880544, respectively). MAN was  
488 supported by a James Cook University scholarship. Funding was also provided by the ARC  
489 Centre of Excellence for Coral Reef Studies (CE0561432 & CE140100020). **Competing**  
490 **interests:** We have no competing interests. **Author contributions:** All authors conceived the  
491 study. JSM provided the data to estimate the wind-water velocity relationship at the site and  
492 helped estimate ‘background mortality’. MAN did the simulations and wrote the first draft  
493 with help from SRC. All authors contributed to subsequent drafts. **Data and materials**  
494 **availability:** All scripts will be publicly available in Github upon publication. No new data  
495 were used.

496

497

## 498 **References**

499 Adler, P.B., HilleRisLambers, J., Kyriakidis, P.C., Guan, Q. & Levine, J.M. (2006). Climate  
500 variability has a stabilizing effect on the coexistence of prairie grasses. *Proc. Natl. Acad.*  
501 *Sci. U. S. A.*, 103, 12793–8.

502 Álvarez-Noriega, M., Baird, A.H., Dornelas, M., Madin, J.S. & Connolly, S.R. (2018).  
503 Negligible effect of competition on coral colony growth. *Ecol.* .

504 Álvarez-Noriega, M., Baird, A.H., Dornelas, M., Madin, J.S., Cumbo, V.R. & Connolly, S.R.

- 505 (2016). Fecundity and the demographic strategies of coral morphologies. *Ecology*, 97,  
506 3485–3493.
- 507 Angert, A.L., Huxman, T.E., Chesson, P. & Venable, D.L. (2009). Functional tradeoffs  
508 determine species coexistence via the storage effect. *Proc. Natl. Acad. Sci. U. S. A.*, 106,  
509 11641–5.
- 510 Armstrong, R.A. & McGehee, R. (1980). Competitive exclusion. *Am. Nat.*
- 511 Aronson, R. & Precht, W. (1995). Landscape patterns of reef coral diversity: A test of the  
512 intermediate disturbance hypothesis. *J. Exp. Mar. Bio. Ecol.*, 192, 1–14.
- 513 Australian Institute of Marine Science. (2017). *Lizard Island wind speed*.  
514 [https://data.gov.au/dataset/imos-faimms-sensor-network-data-lizard-island-weather-](https://data.gov.au/dataset/imos-faimms-sensor-network-data-lizard-island-weather-station-wind-speed-from-13-aug-2010-20171)  
515 [station-wind-speed-from-13-aug-2010-20171,](https://data.gov.au/dataset/imos-faimms-sensor-network-data-lizard-island-weather-station-wind-speed-from-13-aug-2010-20171).
- 516 Baird, A. & Hughes, T. (2000). Competitive dominance by tabular corals: an experimental  
517 analysis of recruitment and survival of understory assemblages. *J. Exp. Mar. Bio. Ecol.*,  
518 251, 117–132.
- 519 Bellwood, D.R. & Hughes, T.P. (2001). Regional-scale assembly rules and biodiversity of  
520 coral reefs. *Science* (80-. ).
- 521 Cáceres, C.E. (1997). Temporal variation, dormancy, and coexistence: a field test of the  
522 storage effect. *Proc. Natl. Acad. Sci. U. S. A.*, 94, 9171–9175.
- 523 Chesson, P. (1994). Multispecies competition in variable environments. *Theor. Popul. Biol.*
- 524 Chesson, P. (2000). Mechanisms of maintenance of species diversity . *Annu. Rev. Ecol. Syst.* .
- 525 Chesson, P. & Huntly, N. (1997). The roles of harsh and fluctuating conditions in the  
526 dynamics of ecological communities. *Am. Nat.*
- 527 Chesson, P.L. & Warner, R.R. (1981). Environmental variability promotes coexistence in  
528 lottery competitive systems. *Am. Nat.*
- 529 Connell, J.H. (1978). Diversity in tropical rain forests and coral reefs. *Science* (80-. ).

- 530 Connell, J.H., Hughes, T.P. & Wallace, C.C. (1997). A 30-year study of coral abundance,  
531 recruitment, and disturbance at several scales in space and time. *Ecol. Monogr.*, 67,  
532 461–488.
- 533 Connell, J.H., Hughes, T.P., Wallace, C.C., Tanner, J.E., Harms, K.E. & Kerr, A.M. (2004).  
534 A long-term study of competition and diversity of corals. *Ecol. Monogr.*
- 535 Done, T.J. (1982). Patterns in the distribution of coral communities across the central Great  
536 Barrier Reef. *Coral Reefs*.
- 537 Dornelas, M. & Connolly, S.R. (2008). Multiple modes in a coral species abundance  
538 distribution. *Ecol. Lett.*, 11, 1008–16.
- 539 Dornelas, M., Madin, J.S., Baird, A.H. & Connolly, S.R. (2017). Allometric growth in reef-  
540 building corals. *Proceedings. Biol. Sci.*
- 541 Doropoulos, C., Evensen, N.R., Gómez-Lemos, L.A. & Babcock, R.C. (2017). Density-  
542 dependent coral recruitment displays divergent responses during distinct early life-  
543 history stages. *R. Soc. open Sci.*, 4, 170082.
- 544 Doropoulos, C., Gómez-Lemos, L. & Babcock, R. (2018). Exploring variable patterns of  
545 density-dependent larval settlement among corals with distinct and shared functional  
546 traits. *J. Int. Soc. Reef Stud.*, 37, 25–29.
- 547 Easterling, M.R., Ellner, S.P. & Dixon, P.M. (2000). Size-specific sensitivity: Applying a  
548 new structured population model. *Ecology*, 81.
- 549 Edwards, A.J., Guest, J.R., Heyward, A.J., Villanueva, R.D., Baria, M.V., Bollozos, I.S.F., *et*  
550 *al.* (2015). Direct seeding of mass-cultured coral larvae is not an effective option for reef  
551 rehabilitation. *Mar. Ecol. Prog. Ser.*, 525, 105–116.
- 552 Ellner, S.P., Snyder, R.E., Adler, P.B. & Hooker, G. (2019). An expanded modern  
553 coexistence theory for empirical applications. *Ecol. Lett.*, 22, 3.
- 554 Fox, J.W. (2013). The intermediate disturbance hypothesis should be abandoned. *Trends*

- 555 *Ecol. Evol.*
- 556 Genner, M.J., Sims, D.W., Southward, A.J., Budd, G.C., Masterson, P., McHugh, M., *et al.*
- 557 (2010). Body size-dependent responses of a marine fish assemblage to climate change
- 558 and fishing over a century-long scale. *Glob. Chang. Biol.*
- 559 Hallett, L.M., Shoemaker, L.G., White, C.T. & Suding, K.N. (2019). Rainfall variability
- 560 maintains grass-forb species coexistence. *Ecol. Lett.*, 22, 1658–1667.
- 561 Heyward, A.J., Smith, L.D., Rees, M. & Field, S.N. (2002). Enhancement of coral
- 562 recruitment by in situ mass culture of coral larvae. *Mar. Ecol. Prog. Ser.*, 230, 113–118.
- 563 Hoogenboom, M., Connolly, S. & Anthony, K. (2011). Biotic and abiotic correlates of tissue
- 564 quality for common scleractinian corals. *Mar. Ecol. Prog. Ser.*, 438, 119–128.
- 565 Hutchinson, G.E. (1961). The paradox of the plankton. *Am. Nat.*
- 566 Jackson, J.B.C. (1979). *Morphological strategies of sessile animals. Biol. Syst. Colon. Org.*
- 567 Academic Press, London.
- 568 Jensen, J.L.W. V. (1906). Sur les fonctions convexes et les inégalités entre les valeurs
- 569 moyennes. *Acta Math.*
- 570 Knutson, T.R. & Tuleya, R.E. (2004). Impact of CO<sub>2</sub>-induced warming on simulated
- 571 hurricane intensity and precipitation sensitivity to the choice of climate model and
- 572 convective parameterization. *J. Clim.*, 17, 3477–3495.
- 573 Letten, A.D., Dhami, M.K., Ke, P.J. & Fukami, T. (2018). Species coexistence through
- 574 simultaneous fluctuation-dependent mechanisms. *Proc. Natl. Acad. Sci. U. S. A.*
- 575 Madin, J.S., Baird, A.H., Dornelas, M. & Connolly, S.R. (2014). Mechanical vulnerability
- 576 explains size-dependent mortality of reef corals. *Ecol. Lett.*, 17, 1008–1015.
- 577 Madin, J.S., Black, K.P. & Connolly, S.R. (2006). Scaling water motion on coral reefs: from
- 578 regional to organismal scales. *Coral Reefs*, 25, 635–644.
- 579 Madin, J.S. & Connolly, S.R. (2006a). Ecological consequences of major hydrodynamic



- 580 disturbances on coral reefs. *Nature*, 444, 477–80.
- 581 Madin, J.S. & Connolly, S.R. (2006b). Ecological consequences of major hydrodynamic  
582 disturbances on coral reefs. *Nature*, 444, 477–80.
- 583 Madin, J.S., Hughes, T.P. & Connolly, S.R. (2012). Calcification, storm damage and  
584 population resilience of tabular corals under climate change. *PLoS One*, 7, e46637.
- 585 Massel, S.R. & Done, T.J. (1993). Effects of cyclone waves on massive coral assemblages on  
586 the Great Barrier Reef: meteorology, hydrodynamics and demography. *Coral Reefs*, 12,  
587 153–166.
- 588 Miller, A.D., Roxburgh, S.H. & Shea, K. (2011). How frequency and intensity shape  
589 diversity-disturbance relationships. *Proc. Natl. Acad. Sci. U. S. A.*, 108, 5643–8.
- 590 Miller, K. & Mundy, C. (2003). Rapid settlement in broadcast spawning corals: implications  
591 for larval dispersal. *Coral reefs*, 22, 99–106.
- 592 Muko, S., Arakaki, S., Nagao, M. & Sakai, K. (2013). Growth form-dependent response to  
593 physical disturbance and thermal stress in *Acropora* corals. *Coral Reefs*.
- 594 Nozawa, Y. & Harrison, P.L. (2008). Temporal patterns of larval settlement and survivorship  
595 of two broadcast-spawning acroporid corals. *Mar. Biol.*, 155, 347–351.
- 596 R Core Team. (2018). R: A Language and Environment for Statistical Computing. R  
597 Foundation for Statistical Computing.
- 598 Roxburgh, S.H., Shea, K. & Wilson, J.B. (2004). The intermediate disturbance hypothesis:  
599 patch dynamics and mechanisms of species coexistence. *Ecology*.
- 600 Salomon, Y., Connolly, S.R. & Bode, L. (2010). Effects of asymmetric dispersal on the  
601 coexistence of competing species. *Ecol. Lett.*
- 602 Smith, L.D. & Hughes, T.P. (1999). An experimental assessment of survival, re-attachment  
603 and fecundity of coral fragments .
- 604 Tanner, J.E., Hughes, T.P. & Connell, J.H. (1994). Species coexistence, keystone species,

605 and succession: a sensitivity analysis. *Ecology*.

606 Tredennick, A.T., Teller, B. j., Adler, P.B., Hooker, G. & Ellner, S.P. (2018).

607 Size-by-environment interactions: a neglected dimension of species' responses to

608 environmental variation. *Ecol. Lett.*, 21, 1757–1770.

609 Zang, C., Pretzsch, H. & Rothe, A. (2012). Size-dependent responses to summer drought in

610 Scots pine, Norway spruce and common oak. *Trees*.

611 Zepeda, V. & Martorell, C. (2019). Fluctuation-independent niche differentiation and relative

612 non-linearity drive coexistence in a species-rich grassland . *Ecol.* .

613

614
